# Supplementary material for: Genome wide characterization of simple sequence repeats in watermelon genome and their application in comparative mapping and genetic diversity analysis
Source: PubMed Central journal article supplement (PMC4974753; doi:10.1186/s12864-016-2870-4), 2016-08-05

**Figure S1**

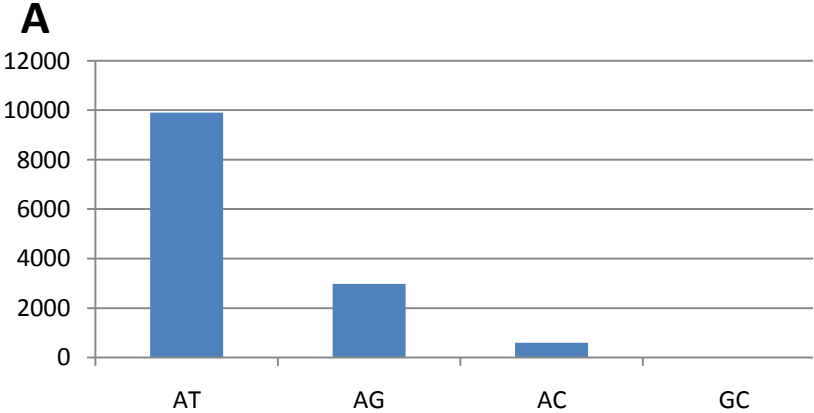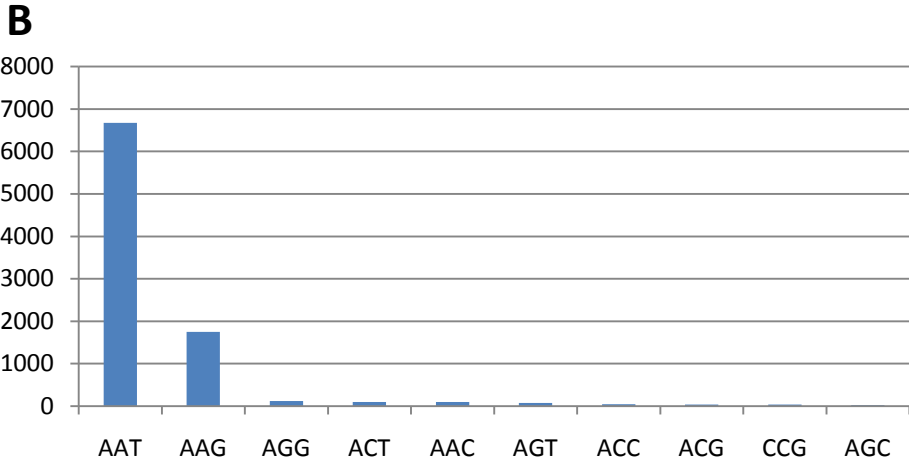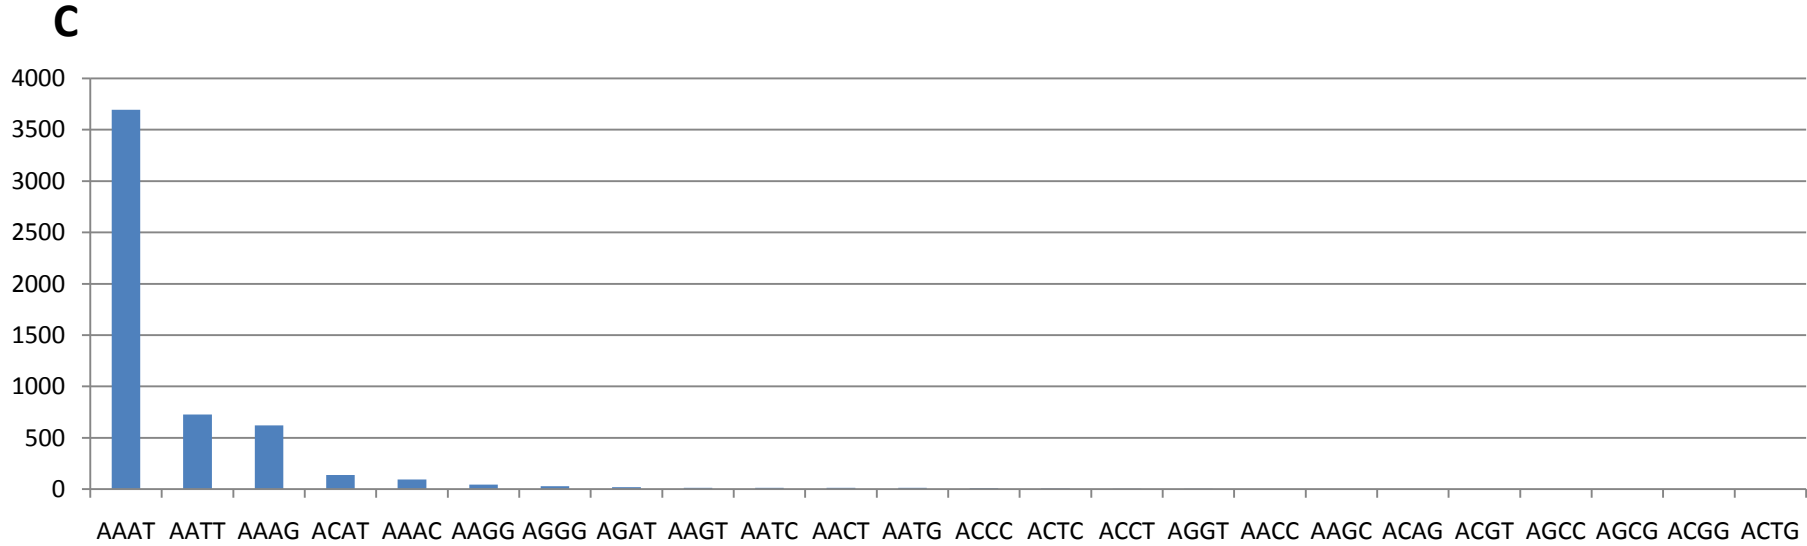

Figure S2

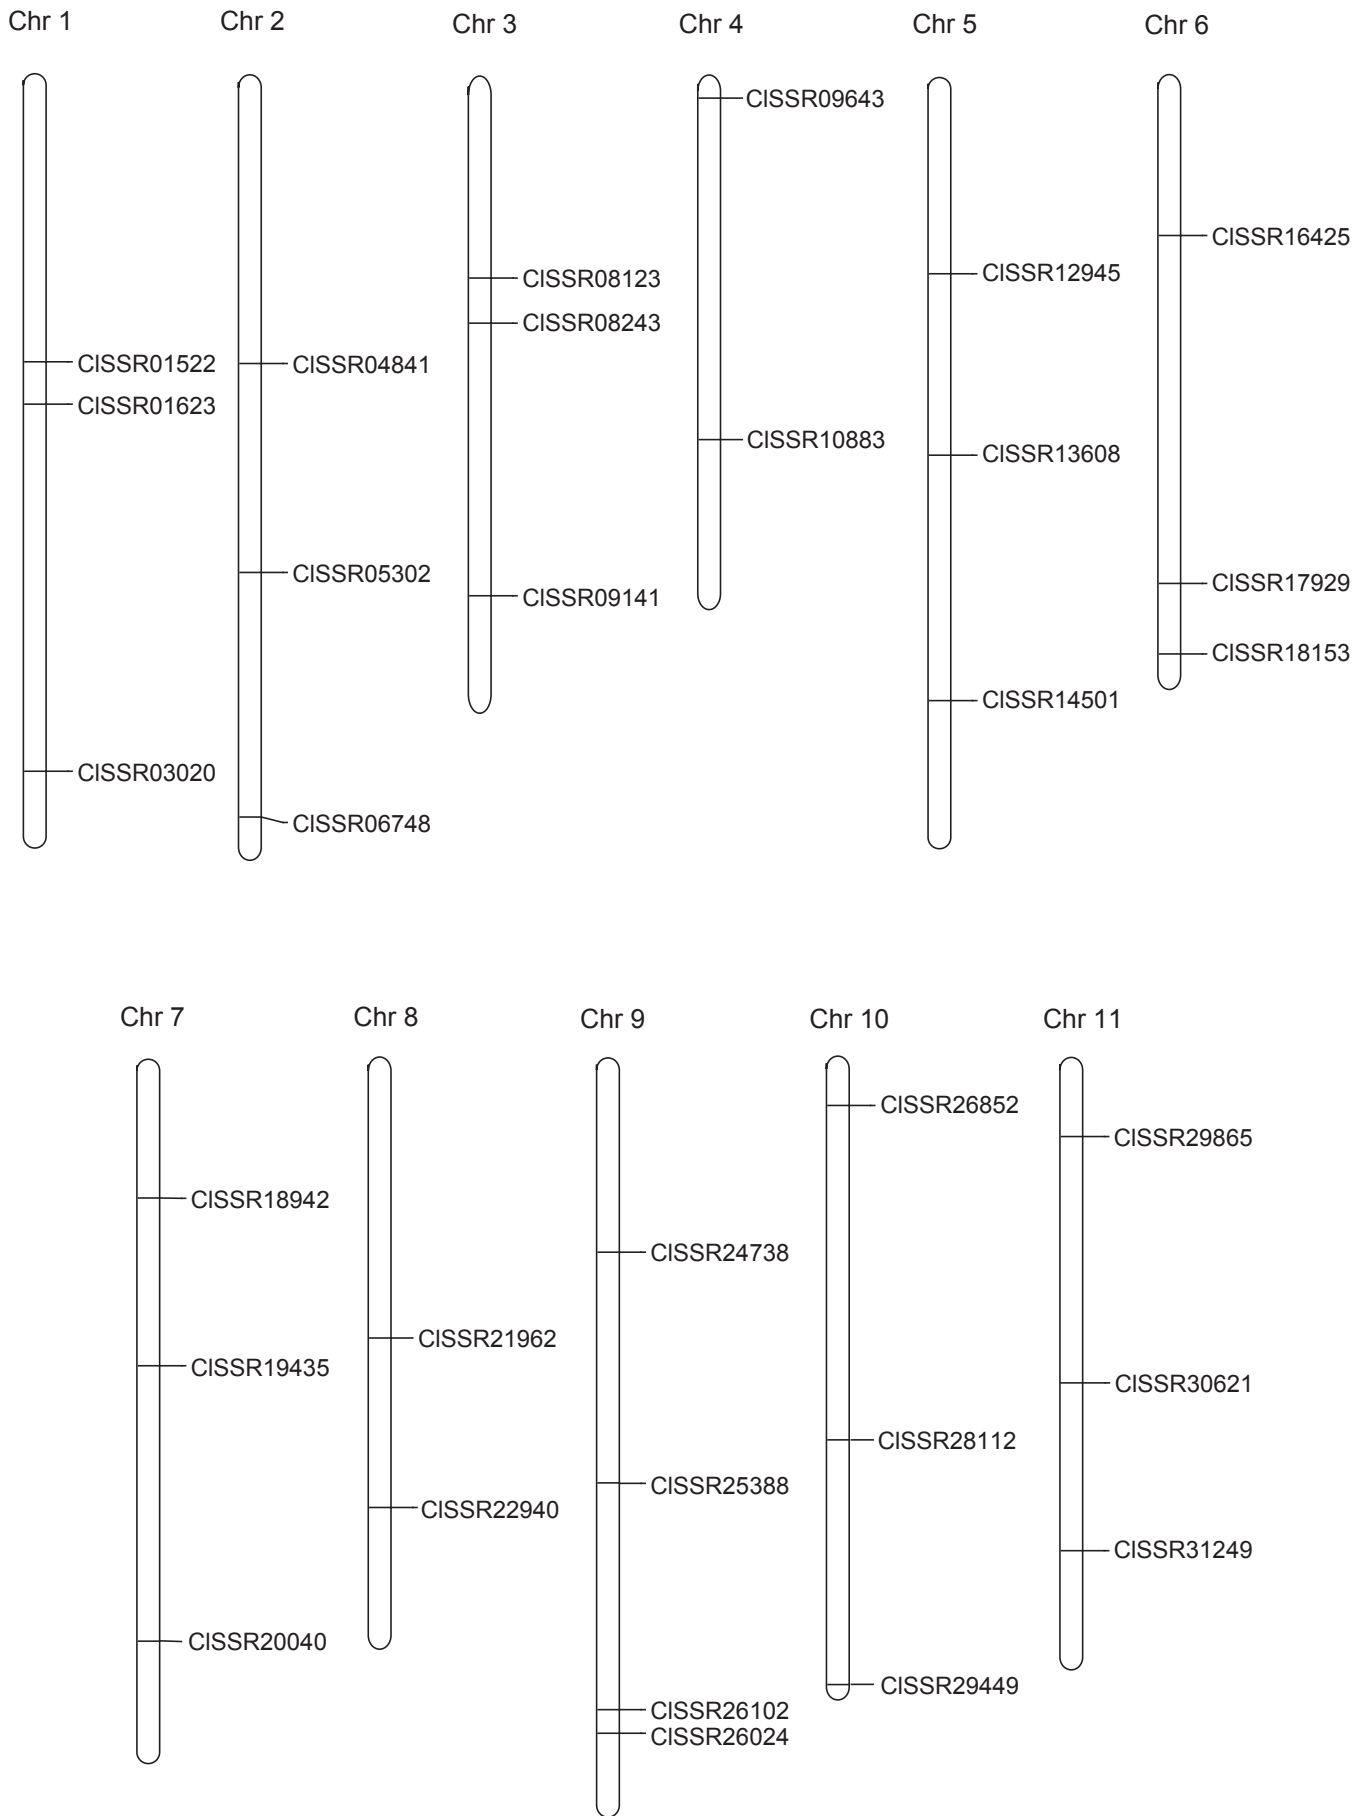

Figure S3

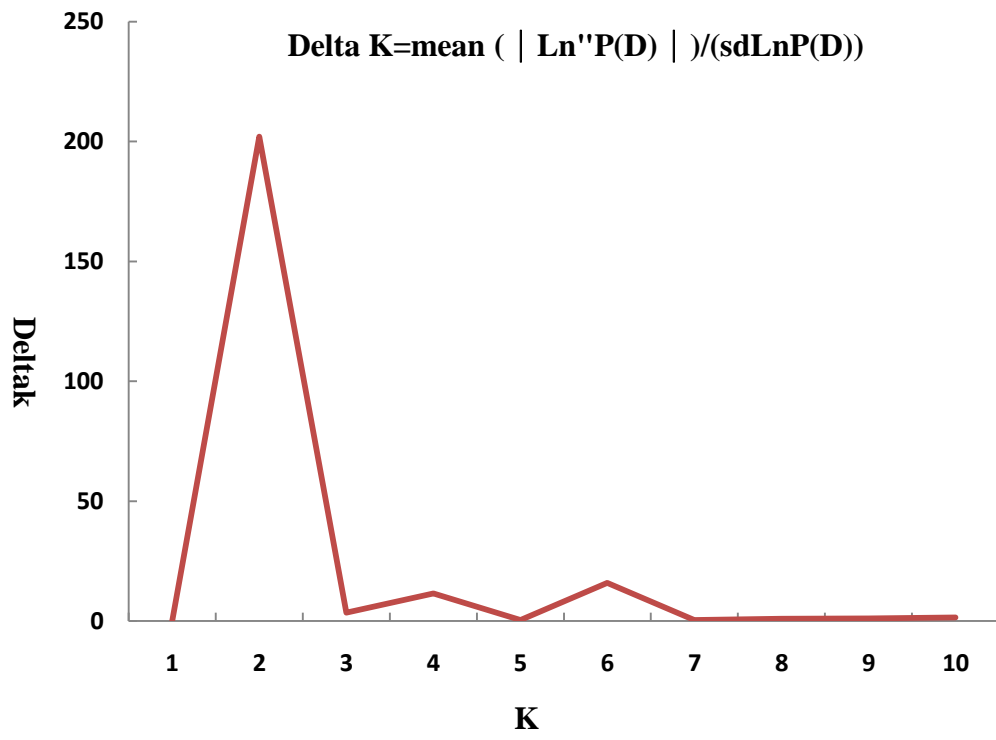

Supplement: 12864_2016_2870_MOESM1_ESM.pdf [file 12864_2016_2870_MOESM1_ESM.pdf]
